# Supplementary material for: Mn-X (X = F, Cl, Br, I) Co-Doped GeSe Monolayers: Stabilities and Electronic, Spintronic and Optical Properties
Source: MDPI journal article supplement (doi:10.3390/nano13121862), 2023-06-15
Supplement: s1 [file s1]

# Supporting Information

## Mn-X (X= F, Cl, Br, I) Co-doped GeSe Monolayers: Stabilities and Electronic, Spintronic and Optical Properties<sup>1</sup>

Wenjie He, Xi Zhang\*, Dan Gong, Ya Nie, Gang Xiang\*

College of Physics, Sichuan University, Chengdu 610065, China

\*Corresponding authors' emails: xizhang@scu.edu.cn; gxiang@scu.edu.cn

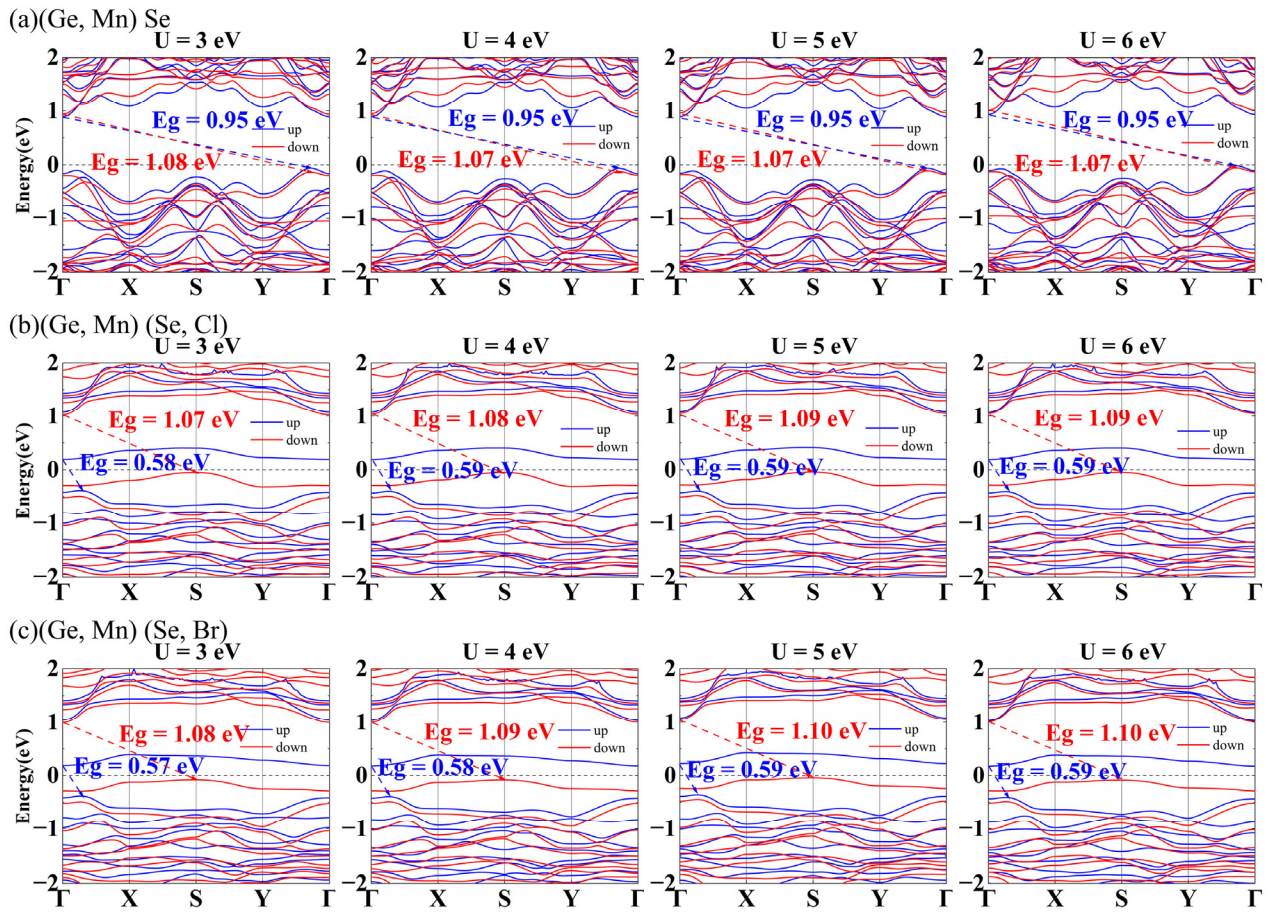

Figure. S1. The band structures of (a) Mn doped, (b) Mn-Cl co-doped, and (c) Mn-Br co-doped GeSe Monolayers with different U values.

<sup>1</sup> Project supported by the National Natural Science Foundation of China (Grant No. 52172272).

Table. S1. The band gaps of Mn doped, Mn-Cl, and Mn-Br co-doped GeSe Monolayers with different U values. I represents indirect band gap.

| Dopant | U value (eV) | Spin | Bandgap (eV) | Change |
|--------|--------------|------|--------------|--------|
| Mn     | 3.0          | up   | 0.9526(I)    | 0%     |
|        |              | down | 1.0752(I)    | 0%     |
|        | 4.0          | up   | 0.9542(I)    | 0.17%  |
|        |              | down | 1.0735(I)    | -0.16% |
|        | 5.0          | up   | 0.9546(I)    | 0.21%  |
|        |              | down | 1.0723(I)    | -0.27% |
|        | 6.0          | up   | 0.9513(I)    | -0.14% |
|        |              | down | 1.0675(I)    | -0.72% |
| Mn-Cl  | 3.0          | up   | 0.5779(I)    | 0%     |
|        |              | down | 1.0709(I)    | 0%     |
|        | 4.0          | up   | 0.5890(I)    | 1.92%  |
|        |              | down | 1.0797(I)    | 0.82%  |
|        | 5.0          | up   | 0.5918(I)    | 2.41%  |
|        |              | down | 1.0864(I)    | 1.45%  |
|        | 6.0          | up   | 0.5930(I)    | 2.61%  |
|        |              | down | 1.0913(I)    | 1.91%  |
| Mn-Br  | 3.0          | up   | 0.5694(I)    | 0%     |
|        |              | down | 1.0771(I)    | 0%     |
|        | 4.0          | up   | 0.5750(I)    | 0.98%  |
|        |              | down | 1.0856(I)    | 0.79%  |
|        | 5.0          | up   | 0.5851(I)    | 2.76%  |
|        |              | down | 1.0961(I)    | 1.76%  |
|        | 6.0          | up   | 0.5858(I)    | 2.88%  |
|        |              | down | 1.0987(I)    | 2.01%  |

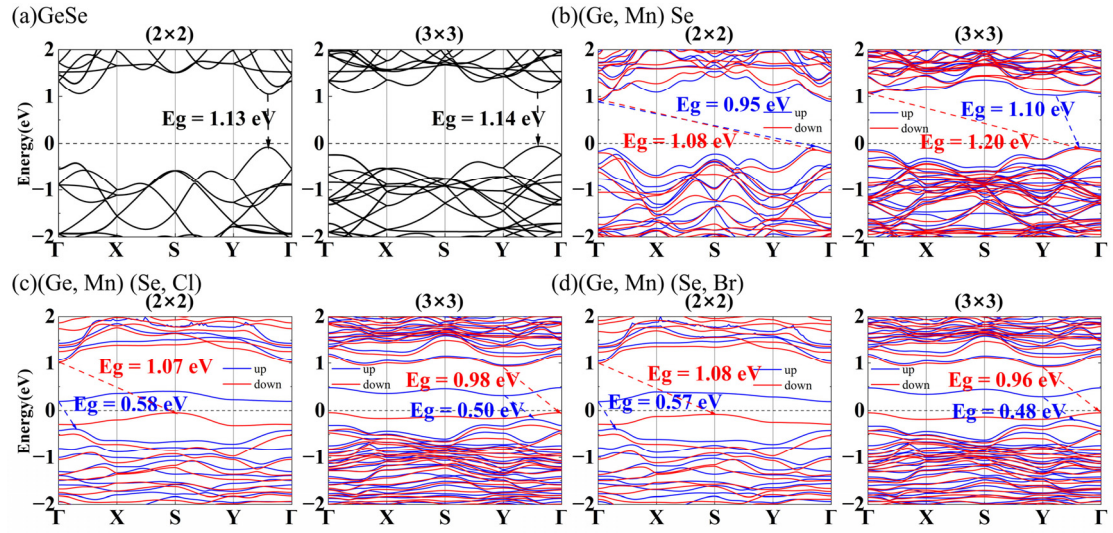

Figure S2. In  $2\times 2$  and  $3\times 3$  supercell, the band structures of (a) undoped, (b) Mn-doped, (c) Mn-Cl co-doped and (d) Mn-Br co-doped GeSe Monolayers.

Table S2. In  $2\times 2$  and  $3\times 3$  supercell, the band gaps of undoped and doped GeSe Monolayers, where D and I show direct and indirect band gaps.

| Dopant | Spin | Bandgap(eV) ( $2\times 2$ ) | Bandgap(eV) ( $3\times 3$ ) | Change |
|--------|------|-----------------------------|-----------------------------|--------|
| None   | up   | 1.13(D)                     | 1.14(D)                     | 0.9%   |
|        | down | 1.13(D)                     | 1.14(D)                     | 0.9%   |
| Mn     | up   | 0.95(I)                     | 1.10(I)                     | 15.8%  |
|        | down | 1.08(I)                     | 1.20(I)                     | 11.1%  |
| Mn-Cl  | up   | 0.58(I)                     | 0.50(I)                     | 13.8%  |
|        | down | 1.07(I)                     | 0.98(I)                     | 8.4%   |
| Mn-Br  | up   | 0.57(I)                     | 0.48(I)                     | 15.8%  |
|        | down | 1.08(I)                     | 0.96(I)                     | 11.1%  |

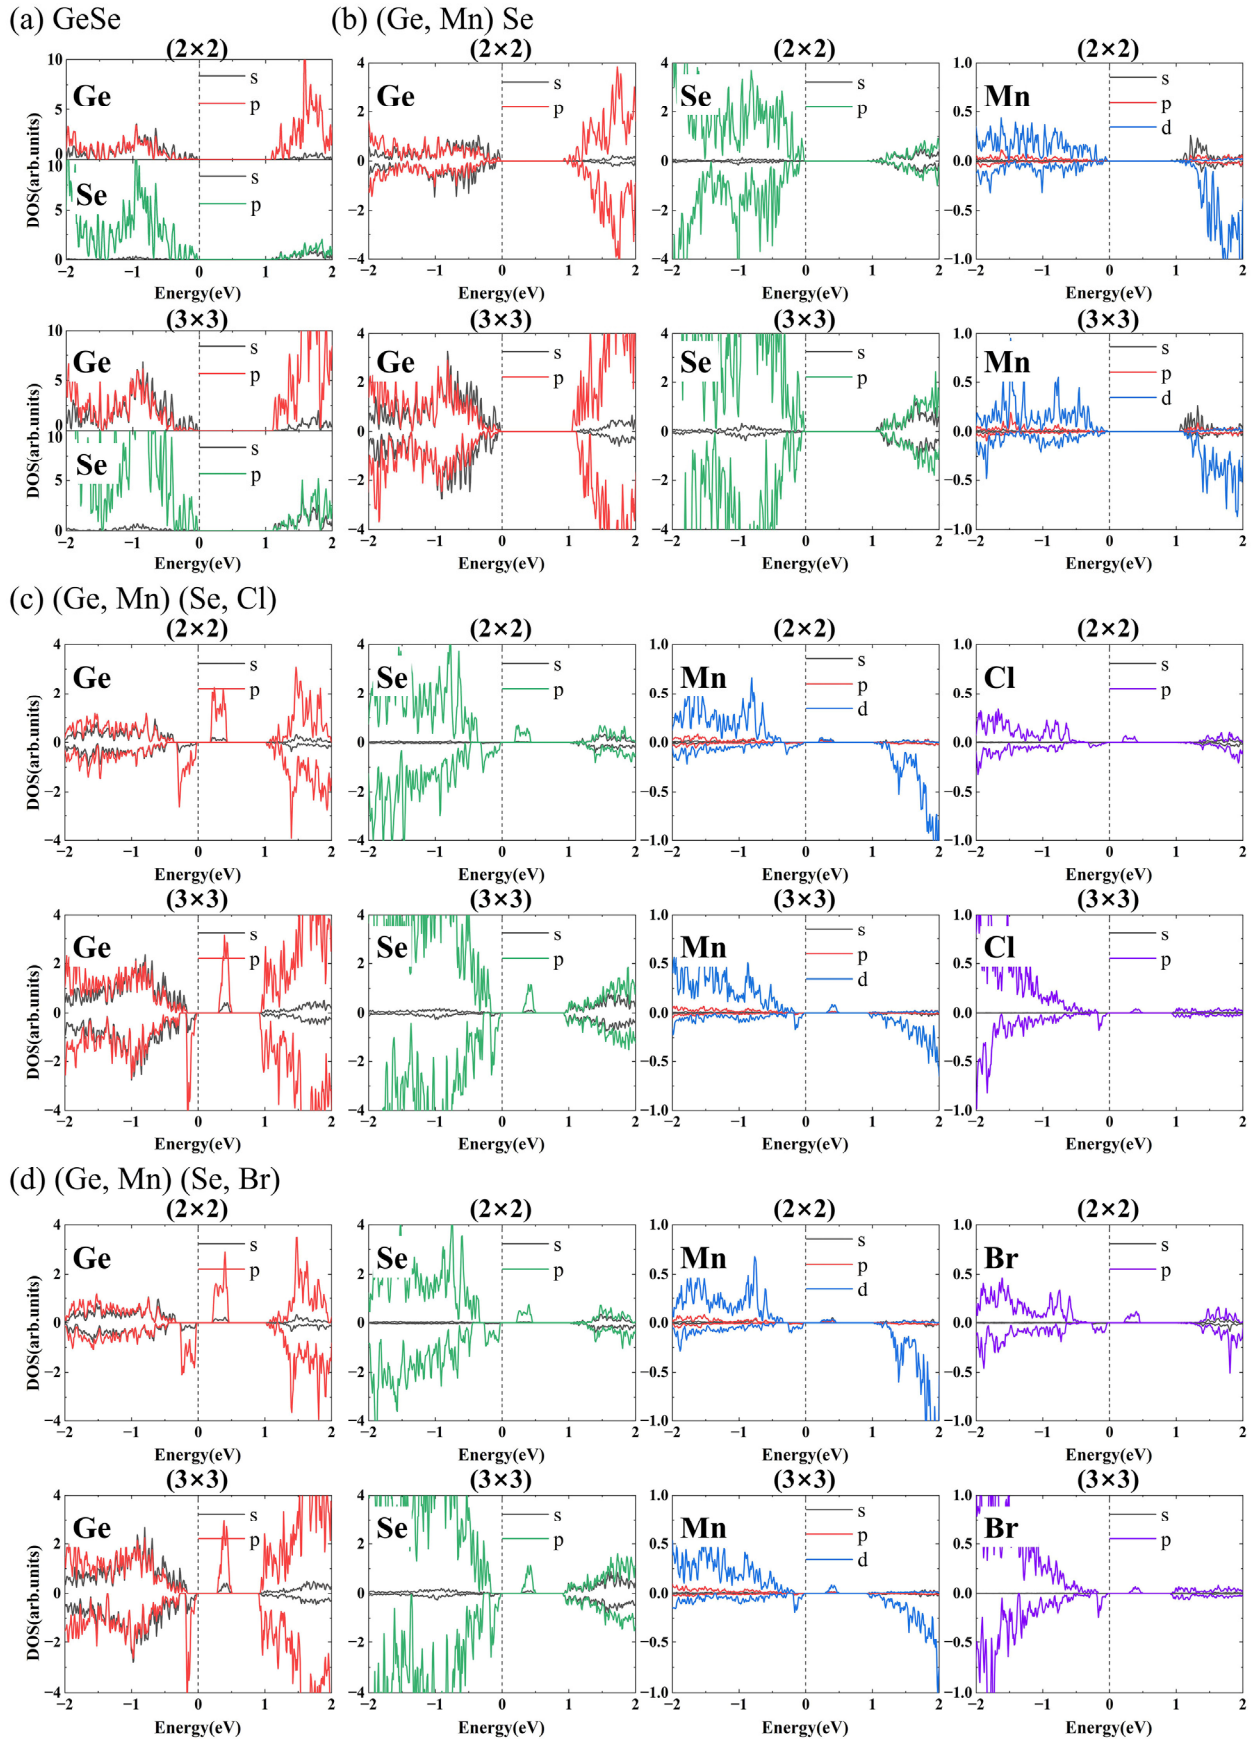

Figure S3. In 2x2 and 3x3 supercell, PDOS of (a) undoped, (b) Mn-doped, (c) Mn-Cl co-doped and (d) Mn-Br co-doped GeSe Monolayers.



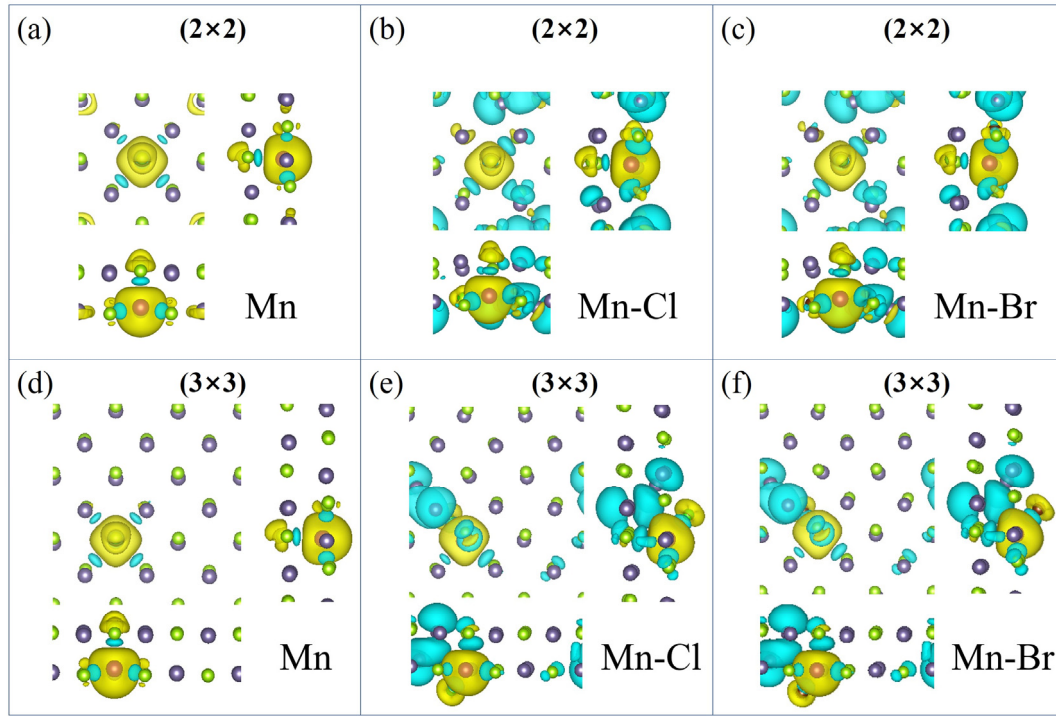

Figure S4. Spin charge density of (a) Mn-doped, (b) Mn-Cl co-doped, (c) Mn-Br co-doped GeSe Monolayers in  $2\times 2$  supercell. Spin charge density of (d) Mn-doped, (e) Mn-Cl co-doped and (f) Mn-Br co-doped GeSe Monolayers in  $3\times 3$  supercell. The yellow and blue represent the spin-up and spin-down electrons distribution, and the isosurface value is set at  $0.001 \text{ eV/\AA}$ .

Table S3. The magnetic moments of doped GeSe Monolayers.

| Dopant | Supercell   | Magnetic Moments( $\mu\text{B}$ ) |
|--------|-------------|-----------------------------------|
| Mn     | $2\times 2$ | 5                                 |
|        | $3\times 3$ | 5                                 |
| Mn-Cl  | $2\times 2$ | 4                                 |
|        | $3\times 3$ | 4                                 |
| Mn-Br  | $2\times 2$ | 4                                 |
|        | $3\times 3$ | 4                                 |

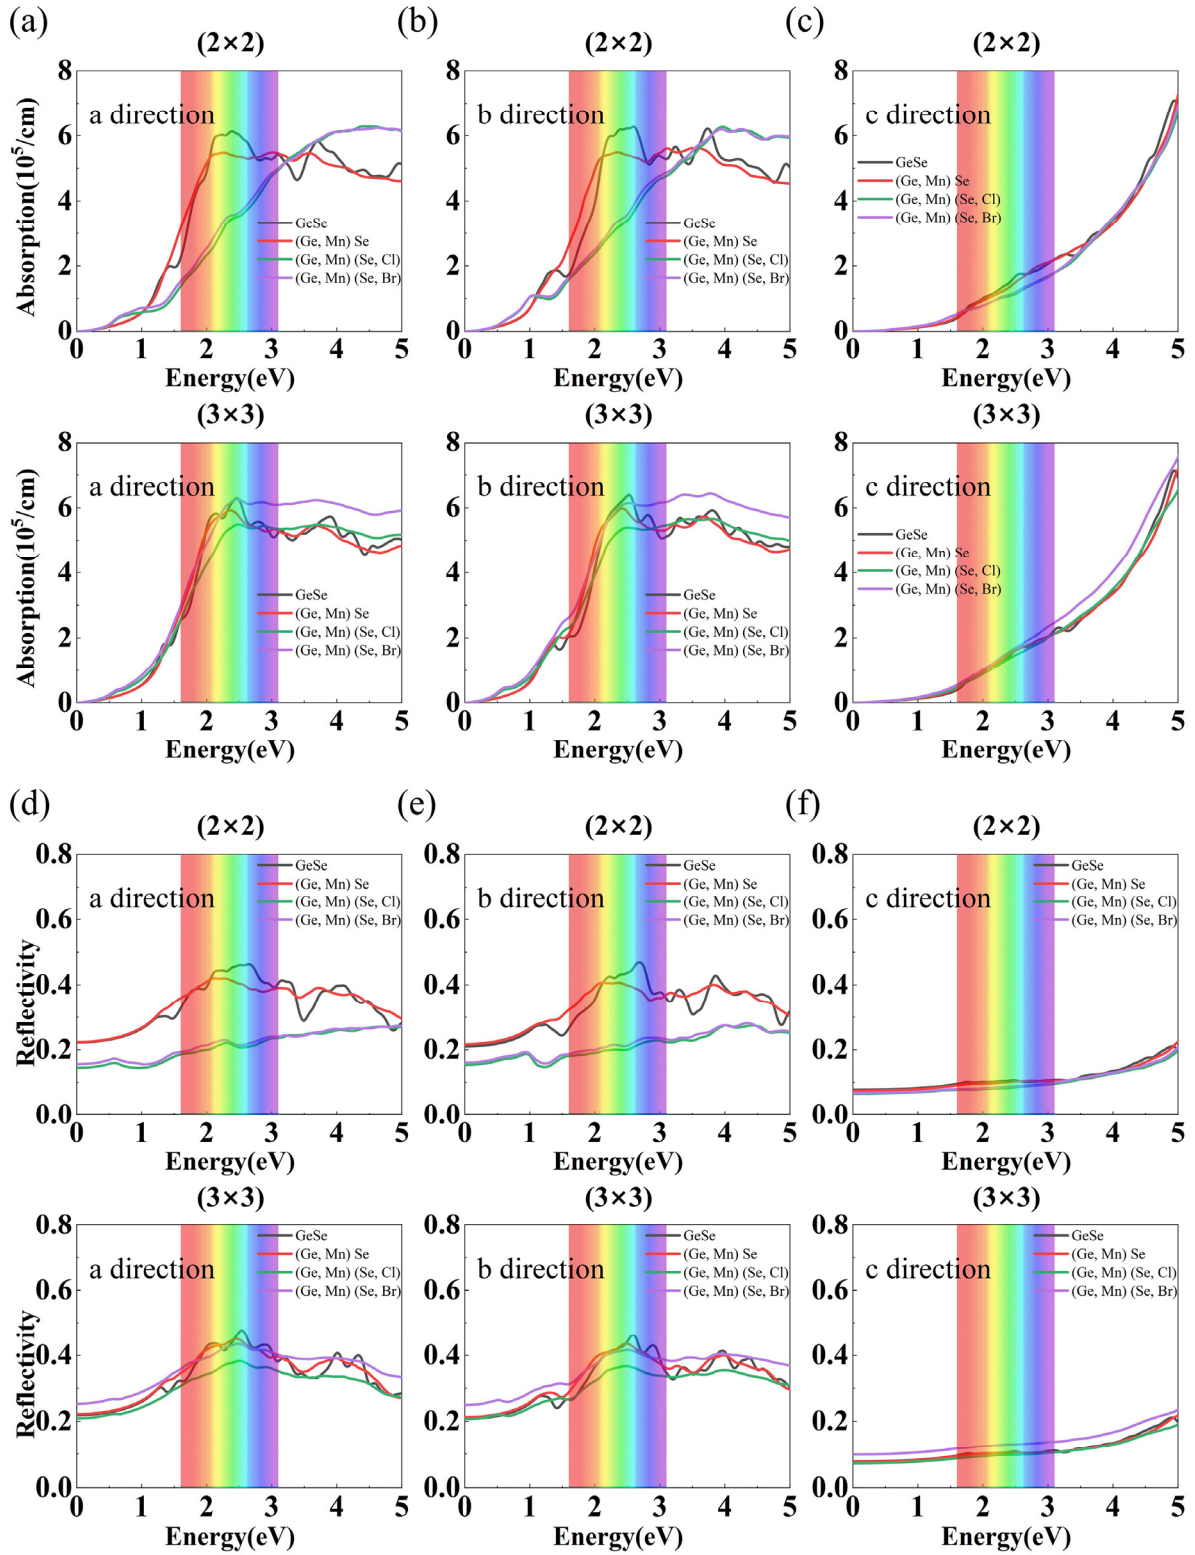

Figure S5. In 2x2 and 3x3 supercell, light absorption of undoped, Mn-doped and Mn-X co-doped GeSe Monolayers along (a) the a direction, (b) the b direction and (c) the c direction. Light reflectivity of undoped, Mn-doped and Mn-X co-doped GeSe Monolayers along (d) the a direction, (e) the b direction and (f) the c direction.
